# Supplementary material for: Distinctive Supramolecular Features of β-Cyclodextrin Inclusion Complexes with Antidepressants Protriptyline and Maprotiline: A Comprehensive Structural Investigation
Source: MDPI journal article supplement (doi:10.3390/ph14080812), 2021-08-18
Supplement: s1 [file s1]

# Supplementary Materials

## Distinctive Supramolecular Features of $\beta$ -Cyclodextrin Inclusion Complexes with Antidepressants Protriptyline and Maprotiline: A Comprehensive Structural Investigation

Thammarat Aree

Department of Chemistry, Faculty of Science, Chulalongkorn University, Bangkok 10330, Thailand;  
athammar@chula.ac.th; Tel.: +66-2-2187584; Fax +66-2-2187598

### Supplementary materials available:

#### 1. Literature survey

**Table S1.** Summary of the CD–3° amine TCA complexes characterized by various techniques.

#### 2. Crystallographic data

**Table S2.** X-ray single crystal data collection and refinement statistics of **1** and **2**.

**Table S3.** Selected geometrical parameters of two  $\beta$ -CD macrocycles of **1** and **2**, in comparison with those of  $\beta$ -CD–(–)-epicatechin and  $\beta$ -CD·12H<sub>2</sub>O.

**Table S4.** Hydrogen bond parameters and  $\pi\cdots\pi$  interactions in  $\beta$ -CD·PRT·HCl·0.4EtOH·12.9H<sub>2</sub>O (**1**).

**Table S5.** Hydrogen bond parameters and  $\pi\cdots\pi$  interactions in  $\beta$ -CD·MPL·HCl·0.7EtOH·10.4H<sub>2</sub>O (**2**).

#### 3. Computational data

**Table S6.** Hydrogen bond parameters in  $\beta$ -CD–PRT and  $\beta$ -CD–MPL inclusion complexes from DFT full-geometry optimization.

**Table S7.** Stabilization and interaction energies of  $\beta$ -CD–PRT and  $\beta$ -CD–MPL, in comparison to other  $\beta$ -CD–TCA inclusion complexes from DFT full-geometry optimization.

**Table S8.** Dispersion-corrected interaction energies of eight  $\beta$ -CD–TCA inclusion complexes from DFT/B97D calculations.

**Table S9.** BSSE- and dispersion-corrected interaction energies of eight  $\beta$ -CD–TCA inclusion complexes from DFT/B97D calculations.

### References

## 1. Literature survey

**Table S1.** Summary of the CD–3° amine TCA complexes characterized by various techniques.

| Host            | Guest         | Ratio | Inclusion mode <sup>a</sup> |            | $K_a$ , M <sup>-1</sup><br>(Tech.) <sup>b</sup>    | Ref. <sup>d</sup> |
|-----------------|---------------|-------|-----------------------------|------------|----------------------------------------------------|-------------------|
|                 |               |       | Aromatic                    | Side chain |                                                    |                   |
| $\alpha$ -CD    | AMT           | 1:1   |                             | ✓          | 113 (FI)                                           | [1]               |
| $\alpha$ -CD    | AMT           | 1:1   |                             | ✓          | 0.06×10 <sup>3</sup> (I)                           | [2]               |
| $\beta$ -CD     | AMT           | 1:1   |                             | ✓          | 23.90×10 <sup>3</sup> (I)                          | [2]               |
| $\beta$ -CD     | AMT           | 1:1   |                             | ✓          | 3.19×10 <sup>3</sup> (C)                           | [3]               |
| HP- $\beta$ -CD | AMT           | 1:1   | ND                          |            | 1.03×10 <sup>3</sup> (C)                           | [4]               |
| $\beta$ -CD     | AMT           | 1:1   | ✓ A/B                       |            | 18.4×10 <sup>3</sup> (H)                           | [5]               |
| $\beta$ -CD     | AMT           | 1:1   | ✓ A/B                       |            | 8.2×10 <sup>3</sup> (N)                            | [6]               |
| $\beta$ -CD     | AMT           | 1:1   | ✓ A                         |            | ND (X)                                             | [7]               |
| $\beta$ -CD     | AMT           | 1:1   | ✓ A                         |            | ND (X)                                             | [8]               |
| $\beta$ -CD     | AMT           | 1:1   |                             | ✓          | ND (Tgl)                                           | [8]               |
| $\alpha$ -CD    | IPM           | 1:1   |                             | ✓          | 130 (FI)                                           | [1]               |
| $\alpha$ -CD    | IPM           | 1:1   |                             | ✓          | 0.08×10 <sup>3</sup> (I)                           | [2]               |
| $\beta$ -CD     | IPM           | 1:1   |                             | ✓          | 8.70×10 <sup>3</sup> (I)                           | [2]               |
| $\beta$ -CD     | IPM           | 1:1   |                             | ✓          | 1.50×10 <sup>3</sup> (C)                           | [3]               |
| $\beta$ -CD     | IPM           | 1:1   |                             | ✓          | 16.7 (U), 808 (F)                                  | [9]               |
| HP- $\beta$ -CD | IPM           | 1:1   | ND <sup>c</sup>             |            | 0.82×10 <sup>3</sup> (C)                           | [4]               |
| $\beta$ -CD     | IPM           | 1:1   | ✓ A/B                       |            | 8.8×10 <sup>3</sup> (H)                            | [5]               |
| $\beta$ -CD     | IPM           | 1:1   | ✓                           | ✓          | ND (N, L)                                          | [10]              |
|                 |               | 1:2   | ✓ A/B                       |            |                                                    |                   |
| $\beta$ -CD     | IPM           | 2:1   | ✓ A+B                       | ✓          | ND (Tgl)                                           | [10]              |
|                 |               | 2:1   | ✓ A+B                       |            |                                                    |                   |
| $\beta$ -CD     | IPM           | 2:1   | ✓ A+B                       |            | ND (Tgl)                                           | [10]              |
| $\beta$ -CD     | IPM           | 1:1   | ✓ A                         |            | ND (Tg)                                            | [11]              |
| $\beta$ -CD     | IPM           | 1:1   | ✓ A                         |            | ND (X)                                             | [12]              |
| $\beta$ -CD     | IPM           | 1:1   | ✓ A                         | ✓          | ND (Tg)                                            | [12]              |
| $\beta$ -CD     | CPM           | 1:1   | ✓ A                         |            | 9.42×10 <sup>3</sup> (U)                           | [13]              |
| HP- $\beta$ -CD | CPM           | 1:1   | ✓ A                         |            | 9.58×10 <sup>3</sup> (U)                           | [13]              |
| $\beta$ -CD     | CPM           | 1:1   | ✓ B                         |            | ND (X)                                             | [14]              |
| $\beta$ -CD     | CPM           | 1:1   | ✓ A+B                       |            | ND (Tg)                                            | [14]              |
| $\alpha$ -CD    | DXP           | 1:1   |                             | ✓          | 140 (FI)                                           | [1]               |
| $\alpha$ -CD    | DXP           | 1:1   |                             | ✓          | 0.05×10 <sup>3</sup> (I)                           | [2]               |
| $\alpha$ -CD    | DXP           | 1:1   |                             | ✓          | ND (Tg)                                            | [15]              |
| $\alpha$ -CD    | DXP           | 2:1   | ✓ A+B                       |            | 16.5×10 <sup>3</sup> (U), 19.6×10 <sup>3</sup> (F) | [15]              |
| $\beta$ -CD     | DXP           | 1:1   |                             | ✓          | 13.21×10 <sup>3</sup> (I)                          | [2]               |
| $\beta$ -CD     | <i>E</i> -DXP | 1:1   |                             | ✓          | 36.0×10 <sup>3</sup> (E)                           | [16]              |
| $\beta$ -CD     | <i>Z</i> -DXP | 1:1   |                             | ✓          | 22.7×10 <sup>3</sup> (E)                           | [16]              |
| $\beta$ -CD     | DXP           | 3:1   | ✓ A+B                       | ✓          | ND (U, F)                                          | [17]              |
| $\beta$ -CD     | DXP           | 1:1   | ✓                           |            | 397 (U), 624 (F)                                   | [17]              |
| $\beta$ -CD     | DXP           | 1:1   | ✓ A/B                       |            | 13.4×10 <sup>3</sup> (H)                           | [5]               |
| $\beta$ -CD     | DXP           | 1:1   | ✓ A+B                       |            | ND (N)                                             | [18]              |
| $\beta$ -CD     | DXP           | 1:1   | ✓ A                         |            | ND (Tg)                                            | [11]              |
| $\beta$ -CD     | DXP           | 2:1   | ✓ A+B                       |            | 14.7×10 <sup>3</sup> (U), 16.2×10 <sup>3</sup> (F) | [15]              |
| $\beta$ -CD     | DXP           | 1:1   | ✓ A+B                       |            | ND (X)                                             | [14]              |
| $\beta$ -CD     | DXP           | 1:1   | ✓ A+B                       |            | ND (Tg)                                            | [14]              |

<sup>a</sup> TCA moiety included in CD cavity: aromatic rings A, B, or side chain.

<sup>b</sup> Binding constant ( $K_a$ ) at 298 K derived from different techniques, mostly in solution: flow injection (FI); fluorescence (F); UV-vis (U); ion-selective electrode (I); capillary electrophoresis (E); light scattering (L); nuclear magnetic resonance (N); theoretical calculation in gas phase or solution (Tgl); single-crystal X-ray analysis (X); conductivity (C); high-performance liquid chromatography (H)

<sup>c</sup> ND – not determined.

<sup>d</sup> Full reference list is given on pages 11–12.

## 2. Crystallographic data

**Table S2.** X-ray single crystal data collection and refinement statistics of **1** and **2**.

|                                                                                                                | <b>1</b>                                                                                                                                                           | <b>2</b>                                                                                                                                                           |
|----------------------------------------------------------------------------------------------------------------|--------------------------------------------------------------------------------------------------------------------------------------------------------------------|--------------------------------------------------------------------------------------------------------------------------------------------------------------------|
|                                                                                                                | $\beta$ -CD–Protriptyline HCl                                                                                                                                      | $\beta$ -CD–Maprotiline HCl                                                                                                                                        |
| Abbreviated formula                                                                                            | $\beta$ -CD·PRT·HCl<br>·0.4EtOH·12.9H <sub>2</sub> O                                                                                                               | $\beta$ -CD·MPL·HCl<br>·0.7EtOH·10.4H <sub>2</sub> O                                                                                                               |
| Chemical formula                                                                                               | (C <sub>6</sub> H <sub>10</sub> O <sub>5</sub> ) <sub>7</sub> ·C <sub>19</sub> H <sub>21</sub> N·HCl<br>·0.4(C <sub>2</sub> H <sub>6</sub> O)·12.9H <sub>2</sub> O | (C <sub>6</sub> H <sub>10</sub> O <sub>5</sub> ) <sub>7</sub> ·C <sub>20</sub> H <sub>23</sub> N·HCl<br>·0.7(C <sub>2</sub> H <sub>6</sub> O)·10.4H <sub>2</sub> O |
| Formula weight                                                                                                 | 1670.92                                                                                                                                                            | 1657.55                                                                                                                                                            |
| Crystal habit, color                                                                                           | Rod, colorless                                                                                                                                                     | Rod, colorless                                                                                                                                                     |
| Crystal size [mm]                                                                                              | 0.42 × 0.40 × 0.38                                                                                                                                                 | 0.46 × 0.42 × 0.30                                                                                                                                                 |
| Crystal system, space gr.                                                                                      | Monoclinic, <i>P</i> 2 <sub>1</sub> (No. 4)                                                                                                                        | Orthorhombic, <i>P</i> 2 <sub>1</sub> 2 <sub>1</sub> 2 <sub>1</sub> (No. 19)                                                                                       |
| <i>a</i> , <i>b</i> , <i>c</i> [Å]                                                                             | 15.6016(4), 18.9261(6), 16.4508(5)                                                                                                                                 | 14.9858(5), 18.6252(5), 29.9133(8)                                                                                                                                 |
| $\alpha$ , $\beta$ , $\gamma$ [°]                                                                              | 90, 117.384(1), 90                                                                                                                                                 | 90, 90, 90                                                                                                                                                         |
| <i>V</i> [Å <sup>3</sup> ]                                                                                     | 4313.2(2)                                                                                                                                                          | 8349.2(4)                                                                                                                                                          |
| <i>Z</i>                                                                                                       | 2                                                                                                                                                                  | 4                                                                                                                                                                  |
| <i>D<sub>c</sub></i> [g cm <sup>−3</sup> ]                                                                     | 1.287                                                                                                                                                              | 1.319                                                                                                                                                              |
| $\mu$ [mm <sup>−1</sup> ]                                                                                      | 0.141                                                                                                                                                              | 0.143                                                                                                                                                              |
| <i>F</i> (000)                                                                                                 | 1774                                                                                                                                                               | 3526                                                                                                                                                               |
| Diffractometer                                                                                                 | APEXII Kappa CCD (Bruker)                                                                                                                                          | APEXII Kappa CCD (Bruker)                                                                                                                                          |
| Wavelength [Å]                                                                                                 | MoK $\alpha$ , 0.71073                                                                                                                                             | MoK $\alpha$ , 0.71073                                                                                                                                             |
| <i>T</i> [K]                                                                                                   | 296(2)                                                                                                                                                             | 296(2)                                                                                                                                                             |
| Data collection                                                                                                | $\omega$ – $\phi$ scan, 0.4° step, 8 s expose                                                                                                                      | $\omega$ – $\phi$ scan, 0.5° step, 8 s expose                                                                                                                      |
| Frames collected                                                                                               | 910                                                                                                                                                                | 966                                                                                                                                                                |
| $\theta$ range [°]                                                                                             | 1.82–25.38                                                                                                                                                         | 1.87–25.35                                                                                                                                                         |
| Resolution [Å]                                                                                                 | 0.83                                                                                                                                                               | 0.83                                                                                                                                                               |
| Completeness [%], <i>R</i> <sub>int</sub>                                                                      | 99.9, 0.0354                                                                                                                                                       | 99.8, 0.0284                                                                                                                                                       |
| Reflns                                                                                                         | 42205 / 15779 / 10114                                                                                                                                              | 53243 / 15279 / 11996                                                                                                                                              |
| collected / unique / observed                                                                                  |                                                                                                                                                                    |                                                                                                                                                                    |
| Data / restraints / parameters                                                                                 | 15779, 5, 1007                                                                                                                                                     | 15279, 29, 930                                                                                                                                                     |
| <i>R</i> <sub>1</sub> <sup>a</sup> , <i>wR</i> <sub>2</sub> [ <i>I</i> > 2 $\sigma$ ( <i>I</i> )] <sup>b</sup> | 0.0781, 0.2074                                                                                                                                                     | 0.0768, 0.2127                                                                                                                                                     |
| <i>R</i> <sub>1</sub> , <i>wR</i> <sub>2</sub> [all data], GoF                                                 | 0.1181, 0.2443, 1.005                                                                                                                                              | 0.0948, 0.2329, 1.025                                                                                                                                              |
| $\Delta\rho_{\min}$ , $\Delta\rho_{\max}$ [e Å <sup>−3</sup> ]                                                 | −0.42, 0.56                                                                                                                                                        | −0.47, 0.69                                                                                                                                                        |
| CCDC number                                                                                                    | 2093556                                                                                                                                                            | 2093557                                                                                                                                                            |

<sup>a,b</sup>  $R = \sum ||F_o| - |F_c|| / \sum |F_o|$ ;  $wR = \sum \{w(F_o^2 - F_c^2)^2 / \sum w(F_o^2)^2\}^{1/2}$ .

**Table S3.** Selected geometrical parameters of two  $\beta$ -CD macrocycles of **1** and **2**, in comparison with those of  $\beta$ -CD-(–)-epicatechin and  $\beta$ -CD·12H<sub>2</sub>O.

| Residue<br><i>n</i> | Puckering $Q$ [Å] <sup>a</sup> , $\theta$ [°] <sup>b</sup> |          |                             |                              | Tilt angle [°] <sup>c</sup> |          |                |                 | O4 deviation [Å] <sup>d</sup> |           |                |                 | O4( <i>n</i> )...O4( <i>n</i> – 1), O4( <i>n</i> )...centroid [Å] |              |                |                 |
|---------------------|------------------------------------------------------------|----------|-----------------------------|------------------------------|-----------------------------|----------|----------------|-----------------|-------------------------------|-----------|----------------|-----------------|-------------------------------------------------------------------|--------------|----------------|-----------------|
|                     | <b>1</b>                                                   | <b>2</b> | $\beta$ -CD-EC <sup>e</sup> | $\beta$ -CD·12W <sup>f</sup> | <b>1</b>                    | <b>2</b> | $\beta$ -CD-EC | $\beta$ -CD·12W | <b>1</b>                      | <b>2</b>  | $\beta$ -CD-EC | $\beta$ -CD·12W | <b>1</b>                                                          | <b>2</b>     | $\beta$ -CD-EC | $\beta$ -CD·12W |
| 1                   | 0.569(9)                                                   | 0.569(6) | 0.561(2)                    | 0.570                        | 30.4(4)                     | 13.6(2)  | 19.7(1)        | 15.0            | 0.128(4)                      | –0.191(3) | –0.180(1)      | 0.192           | 4.498(7)                                                          | 4.504(5)     | 4.403(2)       | 4.489           |
|                     | 4.7(9)                                                     | 4.7(6)   | 6.7(2)                      | 7.6                          |                             |          |                |                 |                               |           |                |                 | 4.678(4)                                                          | 4.944(3)     | 5.171          | 4.981           |
| 2                   | 0.571(10)                                                  | 0.557(6) | 0.545(2)                    | 0.583                        | 12.1(5)                     | 18.8(1)  | 4.6(1)         | 26.2            | –0.251(4)                     | –0.053(3) | –0.084(1)      | 0.091           | 4.445(7)                                                          | 4.315(5)     | 4.263(2)       | 4.392           |
|                     | 1.5(10)                                                    | 3.4(6)   | 5.6(2)                      | 3.0                          |                             |          |                |                 |                               |           |                |                 | 5.119(4)                                                          | 5.262(3)     | 5.397          | 5.153           |
| 3                   | 0.557(9)                                                   | 0.566(6) | 0.574(2)                    | 0.559                        | 5.6(3)                      | 8.2(1)   | 6.9(1)         | 10.8            | –0.071(4)                     | 0.264(3)  | 0.325(1)       | –0.195          | 4.280(7)                                                          | 4.303(5)     | 4.278(2)       | 4.286           |
|                     | 3.9(9)                                                     | 2.9(6)   | 3.7(2)                      | 3.9                          |                             |          |                |                 |                               |           |                |                 | 5.282(4)                                                          | 5.088(4)     | 4.581          | 5.122           |
| 4                   | 0.562(11)                                                  | 0.562(6) | 0.557(2)                    | 0.596                        | 12.3(5)                     | 6.6(1)   | 33.7(1)        | 7.9             | 0.336(4)                      | –0.133(4) | –0.199(1)      | –0.053          | 4.350(6)                                                          | 4.442(5)     | 4.498(2)       | 4.443           |
|                     | 1.4(11)                                                    | 4.0(6)   | 4.9(3)                      | 1.4                          |                             |          |                |                 |                               |           |                |                 | 4.852(4)                                                          | 4.735(4)     | 4.827          | 4.856           |
| 5                   | 0.577(8)                                                   | 0.558(8) | 0.578(2)                    | 0.579                        | 28.7(4)                     | 25.5(3)  | 1.9(1)         | 10.7            | –0.117(4)                     | –0.136(4) | –0.073(1)      | 0.276           | 4.419(6)                                                          | 4.468(6)     | 4.322(2)       | 4.452           |
|                     | 3.4(8)                                                     | 2.3(8)   | 3.2(2)                      | 2.0                          |                             |          |                |                 |                               |           |                |                 | 4.715(4)                                                          | 5.130(3)     | 5.435          | 5.054           |
| 6                   | 0.552(8)                                                   | 0.537(6) | 0.565(2)                    | 0.571                        | 5.6(4)                      | 11.2(2)  | 14.6(1)        | 20.3            | –0.279(4)                     | 0.128(3)  | 0.087(1)       | –0.115          | 4.359(6)                                                          | 4.203(6)     | 4.209(2)       | 4.247           |
|                     | 2.7(8)                                                     | 7.9(6)   | 4.9(2)                      | 3.9                          |                             |          |                |                 |                               |           |                |                 | 5.311(4)                                                          | 5.286(4)     | 5.075          | 5.184           |
| 7                   | 0.561(8)                                                   | 0.557(6) | 0.582(2)                    | 0.567                        | 12.1(3)                     | 0.4(1)   | 30.6(1)        | 6.4             | 0.253(4)                      | 0.122(3)  | 0.124(1)       | –0.196          | 4.171(6)                                                          | 4.405(5)     | 4.626(2)       | 4.338           |
|                     | 6.9(9)                                                     | 0.0(6)   | 8.8(2)                      | 3.7                          |                             |          |                |                 |                               |           |                |                 | 5.091(4)                                                          | 4.797(4)     | 4.632          | 4.913           |
|                     |                                                            |          |                             |                              |                             |          |                |                 |                               |           |                |                 | <i>0.327<sup>g</sup></i>                                          | <i>0.301</i> | <i>0.417</i>   | <i>0.242</i>    |
|                     |                                                            |          |                             |                              |                             |          |                |                 |                               |           |                |                 | <i>0.633<sup>g</sup></i>                                          | <i>0.551</i> | <i>0.854</i>   | <i>0.328</i>    |
|                     |                                                            |          |                             |                              |                             |          |                |                 |                               |           |                |                 | <i>0.873<sup>g</sup></i>                                          | <i>0.871</i> | <i>0.876</i>   | <i>0.870</i>    |

<sup>a,b</sup> A perfect cyclohexane chair (for  $R(\text{C}–\text{C}) = 1.54$  Å) has puckering amplitude  $Q = 0.63$  Å and angle describing the polar position  $\theta = 0^\circ$  [19].<sup>c</sup> Interplanar angle of the plane through C1(*n*), C4(*n*), O4(*n*) and O4(*n* – 1) against the O4 plane.<sup>d</sup> Deviation of glycosidic O4 atoms from the least-squares plane through the seven O4 atoms.<sup>e</sup>  $\beta$ -CD-(–)-epicatechin (EC) [20].<sup>f</sup>  $\beta$ -CD·12H<sub>2</sub>O [21].<sup>g</sup> Ranges of the O4(*n*)...O4(*n* – 1), O4(*n*)...centroid distances and the average of their ratios are in *italics*; for an ideal heptagon, the ratio is 0.868.<sup>h</sup> Endocyclic torsion angles  $\phi$  and  $\psi$  at glycosidic O4, defined as O5(*n* + 1)–C1(*n* + 1)–O4(*n*)–C4(*n*) and C1(*n* + 1)–O4(*n*)–C4(*n*)–C5(*n*), respectively.<sup>i</sup> Averages of  $\phi$  and  $\psi$  are in *italics*; for the  $\beta$ -CD roundness, the sum of averages should be zero [22].<sup>j</sup> Exocyclic torsion angles  $\chi$  and  $\omega$  are defined as C4–C5–C6–O6 and O5–C5–C6–O6, respectively.<sup>k,m</sup> Doubly disordered O64–H group with occupancy factors 0.77 and 0.23 for respective sites A and B.

**Table S3.** Continued.

| Residue<br><i>n</i> | O3( <i>n</i> )...O2( <i>n</i> + 1) distance [Å] |          |                |                 | Torsion angles $\phi^h, \psi^h$ [°] |              |                |                 | Torsion angles $\chi^j, \omega^j$ [°]         |           |                |                 |
|---------------------|-------------------------------------------------|----------|----------------|-----------------|-------------------------------------|--------------|----------------|-----------------|-----------------------------------------------|-----------|----------------|-----------------|
|                     | 1                                               | 2        | $\beta$ -CD-EC | $\beta$ -CD-12W | 1                                   | 2            | $\beta$ -CD-EC | $\beta$ -CD-12W | 1                                             | 2         | $\beta$ -CD-EC | $\beta$ -CD-12W |
| 1                   | 2.866(10)                                       | 2.811(7) | 2.924(2)       | 2.957           | 116.3(7)                            | 114.1(5)     | 100.7(2)       | 119.3           | 59.5(11)                                      | 48.5(9)   | 53.5(2)        | -169.4          |
|                     |                                                 |          |                |                 | -100.4(6)                           | -105.3(5)    | -121.5(2)      | -95.9           | -60.8(10)                                     | -71.4(7)  | -66.8(2)       | 70.5            |
| 2                   | 2.918(9)                                        | 2.816(7) | 2.765(2)       | 2.875           | 103.1(7)                            | 112.2(5)     | 111.6(2)       | 110.5           | 54.6(10)                                      | 179.8(6)  | 58.7(3)        | -173.9          |
|                     |                                                 |          |                |                 | -123.3(7)                           | -112.9(5)    | -118.1(2)      | -106.6          | -65.9(9)                                      | 60.2(8)   | -62.7(2)       | 71.0            |
| 3                   | 2.890(10)                                       | 2.888(7) | 2.762(2)       | 2.902           | 104.3(7)                            | 107.7(5)     | 129.1(2)       | 102.5           | 58.4(9)                                       | 56.2(7)   | 48.9(2)        | 58.7            |
|                     |                                                 |          |                |                 | -114.4(6)                           | -118.6(5)    | -97.4(2)       | -121.1          | -64.4(10)                                     | -65.4(7)  | -72.5(2)       | -60.8           |
| 4                   | 2.853(7)                                        | 2.898(9) | 3.346(3)       | 2.783           | 109.7(8)                            | 105.7(5)     | 90.1(2)        | 107.7           | 47.7(15) <sup>k</sup> 77.7(49) <sup>m</sup>   | 55.2(7)   | 55.7(3)        | 57.0            |
|                     |                                                 |          |                |                 | -110.3(8)                           | -112.4(5)    | -131.9(2)      | -109.4          | -68.9(13) <sup>k</sup> -60.7(50) <sup>m</sup> | -64.6(7)  | -64.5(2)       | -61.0           |
| 5                   | 2.851(8)                                        | 2.817(7) | 2.828(3)       | 2.770           | 119.4(6)                            | 118.5(6)     | 117.1(2)       | 110.7           | 56.1(9)                                       | 65.0(9)   | 60.7(2)        | 50.7            |
|                     |                                                 |          |                |                 | -101.7(7)                           | -100.6(7)    | -105.9(2)      | -114.1          | -63.5(8)                                      | -56.6(8)  | -60.9(2)       | -71.0           |
| 6                   | 2.926(9)                                        | 2.844(7) | 3.246(3)       | 2.855           | 99.1(6)                             | 104.9(6)     | 105.9(2)       | 120.0           | 56.9(7)                                       | -175.8(7) | -167.8(2)      | -175.4          |
|                     |                                                 |          |                |                 | -134.9(5)                           | -119.5(6)    | -96.5(2)       | -109.8          | -66.2(7)                                      | 62.9(10)  | 69.8(2)        | 64.7            |
| 7                   | 2.919(9)                                        | 2.829(7) | 2.833(3)       | 2.862           | 111.3(6)                            | 108.3(6)     | 102.7(2)       | 103.0           | -169.2(6)                                     | 56.2(7)   | 54.2(3)        | 52.1            |
|                     |                                                 |          |                |                 | -103.8(6)                           | -118.5(6)    | -118.4(2)      | -125.7          | 68.7(8)                                       | -65.1(6)  | -64.7(3)       | -62.9           |
|                     |                                                 |          |                |                 | <i>109.0</i> <sup>i</sup>           | <i>110.2</i> | <i>108.2</i>   | <i>110.5</i>    |                                               |           |                |                 |
|                     |                                                 |          |                |                 | -112.7 <sup>i</sup>                 | -112.5       | -112.8         | -111.8          |                                               |           |                |                 |
|                     |                                                 |          |                |                 | -3.7 <sup>i</sup>                   | -2.3         | -4.6           | -1.3            |                                               |           |                |                 |

<sup>a,b</sup> A perfect cyclohexane chair (for  $R(\text{C}-\text{C}) = 1.54 \text{ Å}$ ) has puckering amplitude  $Q = 0.63 \text{ Å}$  and angle describing the polar position  $\theta = 0^\circ$  [19].

<sup>c</sup> Interplanar angle of the plane through C1(*n*), C4(*n*), O4(*n*) and O4(*n* - 1) against the O4 plane.

<sup>d</sup> Deviation of glycosidic O4 atoms from the least-squares plane through the seven O4 atoms.

<sup>e</sup>  $\beta$ -CD-( $\alpha$ )-epicatechin (EC) [20].

<sup>f</sup>  $\beta$ -CD-12H<sub>2</sub>O [21].

<sup>g</sup> Ranges of the O4(*n*)...O4(*n* - 1), O4(*n*)...centroid distances and the average of their ratios are in *italics*; for an ideal heptagon, the ratio is 0.868.

<sup>h</sup> Endocyclic torsion angles  $\phi$  and  $\psi$  at glycosidic O4, defined as O5(*n* + 1)-C1(*n* + 1)-O4(*n*)-C4(*n*) and C1(*n* + 1)-O4(*n*)-C4(*n*)-C5(*n*), respectively.

<sup>i</sup> Averages of  $\phi$  and  $\psi$  are in *italics*; for the  $\beta$ -CD roundness, the sum of averages should be zero [22].

<sup>j</sup> Exocyclic torsion angles  $\chi$  and  $\omega$  are defined as C4-C5-C6-O6 and O5-C5-C6-O6, respectively.

<sup>k,m</sup> Doubly disordered O64-H group with occupancy factors 0.77 and 0.23 for respective sites A and B.

**Table S4.** (a) Hydrogen bond parameters in  $\beta$ -CD·PRT·HCl·0.4EtOH·12.9H<sub>2</sub>O (**1**) [ $\text{\AA}$ ,  $^\circ$ ].

| D–H...A                                                   | D–H  | H...A | D...A     | $\angle(\text{DHA})$ | D–H...A                                       | D–H  | H...A | D...A     | $\angle(\text{DHA})$ |
|-----------------------------------------------------------|------|-------|-----------|----------------------|-----------------------------------------------|------|-------|-----------|----------------------|
| $\beta$ -CD– $\beta$ -CD                                  |      |       |           |                      |                                               |      |       |           |                      |
| O21–H...O37                                               | 0.82 | 2.13  | 2.919(9)  | 162.4                | O26–H...O3W                                   | 0.82 | 2.42  | 3.064(14) | 135.8                |
| O31–H...O22                                               | 0.82 | 2.11  | 2.866(10) | 153.1                | O36–H...O11WA                                 | 0.82 | 2.53  | 3.28(4)   | 151.6                |
| O32–H...O23                                               | 0.82 | 2.15  | 2.918(9)  | 156.5                | O36–H...O11WB                                 | 0.82 | 1.94  | 2.71(4)   | 155.1                |
| O24–H...O33                                               | 0.82 | 2.18  | 2.890(10) | 145.0                | O37–H...O8W                                   | 0.82 | 1.97  | 2.77(3)   | 166.1                |
| O34–H...O25                                               | 0.82 | 2.18  | 2.853(7)  | 139.6                | O1W–H2...O67 <sup>iii</sup>                   | 0.96 | 2.01  | 2.664(14) | 123.1                |
| O64A–H...O61 <sup>iii b c</sup>                           | 0.82 | 2.04  | 2.747(19) | 144.7                | O3W–H1...O33 <sup>vi</sup>                    | 0.97 | 2.55  | 3.091(14) | 115.6                |
| O25–H...O62 <sup>iii</sup>                                | 0.82 | 2.08  | 2.728(8)  | 135.9                | <i>PRT</i> – $\beta$ -CD/ <i>Cl</i>           |      |       |           |                      |
| O35–H...O26                                               | 0.82 | 2.04  | 2.851(8)  | 171.1                | N5'P–H1...O21 <sup>viii</sup>                 | 0.89 | 2.41  | 3.087(10) | 133.1                |
| O66–H...O63 <sup>vi</sup>                                 | 0.82 | 2.21  | 2.878(9)  | 138.9                | N5'P–H1...O31 <sup>viii</sup>                 | 0.89 | 2.06  | 2.856(11) | 148.6                |
| O27–H...O36                                               | 0.82 | 2.35  | 2.926(8)  | 128.3                | N5'P–H2...Cl2                                 | 0.89 | 2.07  | 2.934(15) | 162.3                |
| O67–H...O35 <sup>vii</sup>                                | 0.82 | 2.06  | 2.733(9)  | 138.9                | C51–H...Cg2 <sup>d</sup>                      | 0.98 | 3.69  | 4.461     | 137.8                |
| $\beta$ -CD–H <sub>2</sub> O/EtOH/ <i>Cl</i> <sup>a</sup> |      |       |           |                      | C55–H...Cg2                                   | 0.98 | 3.39  | 4.239     | 146.3                |
| O61–H...O12WB <sup>i</sup>                                | 0.82 | 1.69  | 2.48(4)   | 161.5                | C32–H...Cg1                                   | 0.98 | 3.21  | 4.135     | 158.9                |
| O22–H...Cl1                                               | 0.82 | 2.41  | 3.097(11) | 142.0                | <i>H<sub>2</sub>O</i> – <i>H<sub>2</sub>O</i> |      |       |           |                      |
| O62–H...O7W                                               | 0.82 | 1.90  | 2.67(2)   | 155.6                | O1E–H...O7W                                   | 0.82 | 2.14  | 2.70(5)   | 125.1                |
| O23–H...O10WA                                             | 0.82 | 2.05  | 2.85(3)   | 163.5                | O1W–H1...O12WA                                | 0.96 | 1.98  | 2.93(3)   | 172.9                |
| O23–H...O10WB                                             | 0.82 | 2.25  | 2.82(4)   | 127.2                | O2W–H1...O6W <sup>vii</sup>                   | 0.96 | 1.99  | 2.70(3)   | 129.1                |
| O33–H...O3W <sup>ii</sup>                                 | 0.82 | 2.43  | 3.091(14) | 138.2                | O3W–H2...O1W <sup>vi</sup>                    | 0.98 | 2.39  | 3.00(3)   | 120.3                |
| O63–H...O12WA                                             | 0.82 | 2.33  | 2.74(2)   | 112.4                | O4W–H1...O2W <sup>vii</sup>                   | 0.96 | 2.35  | 2.83(3)   | 110.4                |
| O64B–H...O8W <sup>iv</sup>                                | 0.82 | 2.62  | 3.16(6)   | 124.7                | O4W–H2...O7W <sup>vi</sup>                    | 0.96 | 1.62  | 2.53(4)   | 157.1                |
| O65–H...Cl1 <sup>v</sup>                                  | 0.82 | 2.26  | 3.073(12) | 174.0                | O5W–H1...O1E <sup>ix</sup>                    | 0.96 | 2.23  | 2.99(5)   | 135.5                |
| O26–H...Cl1 <sup>viii</sup>                               | 0.82 | 2.78  | 3.403(12) | 133.7                | O6W–H1...O12WA <sup>iii</sup>                 | 0.96 | 1.84  | 2.72(2)   | 151.9                |

<sup>a</sup> Site occupancy factors (SOFs) are as follows:

12.9 water molecules are distributed over 20 sites: 1.0 (O1W, O3W, O5W, O6W); 0.8 (O2W, O4W);

0.7 (O7W, O8W, O10WA, O12WA); 0.6 (O9WA); 0.5 (O10WB, O11WA/B, O12WB/C);

0.4 (O9WB, O14W); 0.3 (O13W, O15W)

EtOH: 0.4 (O1E); one twofold disordered chloride: 0.5 (Cl1, Cl2)

<sup>b</sup> Equivalent positions: (i)  $-x, y + 0.5, -z + 1$ ; (ii)  $x - 1, y, z$ ; (iii)  $-x, y - 0.5, -z + 1$ ; (iv)  $x - 1, y, z - 1$ ;(v)  $x, y, z - 1$ ; (vi)  $x + 1, y, z$ ; (vii)  $-x + 1, y + 0.5, -z + 1$ ; (viii)  $-x + 1, y - 0.5, -z + 2$ ; (ix)  $-x, y - 0.5, -z + 2$ .<sup>c</sup> Twofold disordered O64–H group with occupancy factors 0.77 and 0.23 for respective sites A and B.<sup>d</sup> Cg1 = A-ring (C1P–C2P–C3P–C4P–C13P–C12P), Cg2 = B-ring (C6P–C7P–C8P–C9P–C15P–C14P)(b)  $\pi\cdots\pi$  interactions in  $\beta$ -CD·PRT·HCl·0.4EtOH·12.9H<sub>2</sub>O (**1**) [ $\text{\AA}$ ,  $^\circ$ ].There is no  $\pi\cdots\pi$  interaction in **1**.

**Table S5.** (a) Hydrogen bond parameters in  $\beta$ -CD·MPL·HCl·0.7EtOH·10.4H<sub>2</sub>O (**2**) [ $\text{\AA}$ ,  $^\circ$ ].

| D–H...A                                           | D–H  | H...A | D...A     | $\angle(\text{DHA})$ | D–H...A                                             | D–H  | H...A | D...A     | $\angle(\text{DHA})$ |
|---------------------------------------------------|------|-------|-----------|----------------------|-----------------------------------------------------|------|-------|-----------|----------------------|
| $\beta$ -CD– $\beta$ -CD                          |      |       |           |                      |                                                     |      |       |           |                      |
| O22–H...O31                                       | 0.82 | 2.11  | 2.811(7)  | 143.4                | O3W–H2...O66                                        | 0.96 | 2.06  | 2.888(11) | 143.2                |
| O32–H...O23                                       | 0.82 | 2.00  | 2.816(7)  | 171.8                | O4W–H2...O37                                        | 0.96 | 1.89  | 2.832(7)  | 166.8                |
| O24–H...O33                                       | 0.82 | 2.08  | 2.888(7)  | 166.2                | O67–H...Cl2                                         | 0.82 | 2.04  | 2.833(9)  | 163.7                |
| O64–H...O67 <sup>i b c</sup>                      | 0.82 | 2.15  | 2.945(8)  | 164.8                | <i>MPL</i> – $\beta$ -CD/H <sub>2</sub> O           |      |       |           |                      |
| O25–H...O34                                       | 0.82 | 2.10  | 2.898(9)  | 164.2                | O61–H...N5'M <sup>ii</sup>                          | 0.82 | 2.44  | 3.159(12) | 146.4                |
| O66–H...O32 <sup>ii</sup>                         | 0.82 | 2.04  | 2.805(8)  | 154.2                | N5'M–H1...O52 <sup>iv</sup>                         | 0.89 | 2.50  | 3.141(8)  | 129.2                |
| O26–H...O35                                       | 0.82 | 2.01  | 2.817(7)  | 167.7                | N5'M–H1...O62 <sup>iv</sup>                         | 0.89 | 2.10  | 2.930(11) | 155.7                |
| O27–H...O36                                       | 0.82 | 2.23  | 2.844(7)  | 132.4                | N5'M–H2...O61 <sup>iv</sup>                         | 0.89 | 2.60  | 3.159(12) | 121.7                |
| O37–H...O21                                       | 0.82 | 2.17  | 2.829(7)  | 137.6                | N5'M–H2...O13W                                      | 0.89 | 2.33  | 3.09(6)   | 143.3                |
| $\beta$ -CD–H <sub>2</sub> O/EtOH/Cl <sup>a</sup> |      |       |           |                      |                                                     |      |       |           |                      |
| O21–H...O6WA                                      | 0.82 | 2.12  | 2.825(11) | 144.6                | C51–H...Cg1 <sup>c</sup>                            | 0.98 | 3.577 | 4.515     | 161.1                |
| O21–H...O6WB                                      | 0.82 | 2.09  | 2.90(2)   | 170.5                | C55–H...Cg1                                         | 0.98 | 3.843 | 4.782     | 161.4                |
| O31–H...O6WB                                      | 0.82 | 2.29  | 3.07(2)   | 159.5                | C31–H...Cg2                                         | 0.98 | 3.018 | 3.903     | 150.9                |
| O1E–H...O22 <sup>ii</sup>                         | 0.82 | 2.07  | 2.81(2)   | 150.2                | O21–H...Cg2                                         | 0.82 | 4.394 | 4.499     | 92.1                 |
| O62–H...O4W <sup>ii</sup>                         | 0.82 | 1.92  | 2.743(9)  | 175.3                | O37–H...Cg2                                         | 0.82 | 3.930 | 4.520     | 132.0                |
| O23–H...Cl1                                       | 0.82 | 1.96  | 2.768(7)  | 170.5                | <i>H<sub>2</sub>O</i> – <i>H<sub>2</sub>O</i> /EtOH |      |       |           |                      |
| O33–H...O6WA <sup>i</sup>                         | 0.82 | 2.22  | 2.972(12) | 152.3                | O1W–H1...O11W <sup>ii</sup>                         | 0.96 | 2.11  | 2.96(2)   | 146.3                |
| O63–H...Cl2 <sup>i</sup>                          | 0.82 | 2.03  | 2.846(7)  | 170.5                | O1W–H2...O12W                                       | 0.96 | 2.36  | 3.32(4)   | 172.2                |
| O5W–H2...O24 <sup>iii</sup>                       | 0.96 | 2.20  | 2.872(11) | 126.2                | O2W–H1...O6WA <sup>ii</sup>                         | 0.96 | 1.90  | 2.785(13) | 151.5                |
| O34–H...O1W <sup>iv</sup>                         | 0.82 | 2.52  | 3.120(15) | 131.0                | O2W–H1...O6WB <sup>ii</sup>                         | 0.96 | 2.26  | 3.02(2)   | 136.2                |
| O35–H...O11W                                      | 0.82 | 2.06  | 2.87(2)   | 175.6                | O3W–H1...O1E                                        | 0.96 | 1.88  | 2.75(2)   | 149.1                |
| O65–H...O3W                                       | 0.82 | 2.23  | 2.824(12) | 129.8                | O4W–H1...O10W                                       | 0.96 | 2.04  | 2.79(2)   | 134.2                |
| O2W–H2...O65                                      | 0.96 | 2.19  | 2.859(11) | 125.5                | O5W–H1...O4W                                        | 0.96 | 2.06  | 2.784(13) | 131.0                |

<sup>a</sup> Site occupancy factors (SOFs) are as follows:

10.4 water molecules distributed over 16 sites: 1.0 (O1W–O5W); 0.8 (O7W); 0.7 (O6WA, O8WA);

0.6 (O10W, O11W); 0.4 (O9W, O12W), 0.3 (O6WB, O8WB, O13W, O14W);

EtOH: 0.7 (O1E); one twofold disordered chloride: 0.5 (Cl1, Cl2)

<sup>b</sup> Equivalent positions: (i)  $x + 1, y, z$ ; (ii)  $-x + 1, y - 0.5, -z + 1.5$ ; (iii)  $x - 1, y, z$ ; (iv)  $-x + 1, y + 0.5, -z + 1.5$ .<sup>c</sup> Cg1 = A-ring (C1M–C2M–C3M–C4M–C13M–C12M), Cg2 = B-ring (C6M–C7M–C8M–C9M–C15M–C14M)**(b)  $\pi$ ... $\pi$  interactions in  $\beta$ -CD·MPL·HCl·0.7EtOH·10.4H<sub>2</sub>O (**2**) [ $\text{\AA}$ ,  $^\circ$ ].**

| <i>Cg(I)</i> | <i>Cg(J)</i>                               | <i>Cg–Cg</i> | Alpha   | <i>CgI</i> _Perp | <i>CgJ</i> _Perp | Type         |
|--------------|--------------------------------------------|--------------|---------|------------------|------------------|--------------|
| <i>Cg2</i>   | <i>Cg1</i>                                 | 4.482(3)     | 61.4(3) | 2.241(2)         | 2.331(2)         | Edge-to-face |
| <i>Cg2</i>   | <i>Cg1</i> ( $-x + 1, y + 0.5, -z + 1.5$ ) | 5.587(3)     | 60.4(3) | 1.280(2)         | 4.076(2)         | Edge-to-face |

Note:

- *Cg(I)* = Plane number *I*- *Cg1* = A-ring (C1M–C2M–C3M–C4M–C13M–C12M), *Cg2* = B-ring (C6M–C7M–C8M–C9M–C15M–C14M)- Alpha = Interplanar angle between planes *I* and *J* [ $^\circ$ ]- *Cg–Cg* = Distance between ring centroids [ $\text{\AA}$ ]- *CgI*\_Perp = Perpendicular distance of *Cg(I)* on ring *J* [ $\text{\AA}$ ]- *CgJ*\_Perp = Perpendicular distance of *Cg(J)* on ring *I* [ $\text{\AA}$ ]

### 3. Computational data

**Table S6.** Hydrogen bond parameters in  $\beta$ -CD-PRT and  $\beta$ -CD-MPL inclusion complexes from DFT full-geometry optimization [ $\text{\AA}$ ,  $^\circ$ ]. <sup>a</sup>

| D-H...A                      | D-H  | H...A | D...A       | $\angle(\text{DHA})$ | D-H...A                  | D-H  | H...A | D...A | $\angle(\text{DHA})$ |
|------------------------------|------|-------|-------------|----------------------|--------------------------|------|-------|-------|----------------------|
| $\beta$ -CD-PRT <sup>b</sup> |      |       |             |                      |                          |      |       |       |                      |
| $\beta$ -CD- $\beta$ -CD     |      |       |             |                      |                          |      |       |       |                      |
|                              |      |       | $\beta$ -CD | <u>conformation</u>  |                          |      |       |       |                      |
|                              |      |       | Distorted   | round                | $\beta$ -CD-PRT          |      |       |       |                      |
| O21-H...O37                  | 0.98 | 2.09  | 3.00        | 155.8                | C52-H...Cg2 <sup>c</sup> | 1.10 | 3.75  | 4.80  | 162.2                |
| O31-H...O22                  | 0.98 | 1.96  | 2.91        | 163.5                | C55-H...Cg2              | 1.10 | 4.61  | 3.56  | 161.6                |
| O32-H...O23                  | 0.98 | 1.90  | 2.86        | 165.8                | C31-H...Cg1 <sup>c</sup> | 1.10 | 4.49  | 3.46  | 157.1                |
| O24-H...O33                  | 0.98 | 2.11  | 2.95        | 143.6                |                          |      |       |       |                      |
| O34-H...O25                  | 0.98 | 1.95  | 2.91        | 167.0                |                          |      |       |       |                      |
| O35-H...O26                  | 0.98 | 1.91  | 2.87        | 167.2                |                          |      |       |       |                      |
| O27-H...O36                  | 0.98 | 1.95  | 2.92        | 167.0                |                          |      |       |       |                      |
| $\beta$ -CD-MPL <sup>b</sup> |      |       |             |                      |                          |      |       |       |                      |
| $\beta$ -CD- $\beta$ -CD     |      |       |             |                      |                          |      |       |       |                      |
|                              |      |       | Distorted   | round                | $\beta$ -CD-MPL          |      |       |       |                      |
| O21-H...O37                  | 0.98 | 2.05  | 2.98        | 158.3                | C51-H...Cg1 <sup>c</sup> | 1.10 | 3.93  | 4.98  | 160.7                |
| O61-H...O52                  | 0.98 | 2.03  | 2.93        | 151.4                | C31-H...Cg2 <sup>c</sup> | 1.10 | 3.37  | 4.30  | 143.5                |
| O22-H...O31                  | 0.98 | 1.95  | 2.90        | 160.6                |                          |      |       |       |                      |
| O32-H...O23                  | 0.98 | 1.91  | 2.88        | 167.0                |                          |      |       |       |                      |
| O24-H...O33                  | 0.98 | 2.01  | 2.90        | 151.2                |                          |      |       |       |                      |
| O25-H...O34                  | 0.98 | 1.98  | 2.93        | 163.5                |                          |      |       |       |                      |
| O65-H...O56                  | 0.98 | 2.12  | 2.97        | 144.5                |                          |      |       |       |                      |
| O26-H...O35                  | 0.98 | 1.98  | 2.94        | 165.9                |                          |      |       |       |                      |
| O27-H...O36                  | 0.98 | 2.05  | 3.00        | 162.5                |                          |      |       |       |                      |
| O67-H...O51                  | 0.98 | 1.99  | 2.90        | 153.8                |                          |      |       |       |                      |

<sup>a</sup> DFT energy minimization in vacuum at the B3LYP/6-31+G(d)/4-31G level, see also Figure 8 and Table 3.

<sup>b</sup> X-ray-derived structures are used as starting models.

<sup>c</sup> C/O-H... $\pi$  interactions with Cg1 and Cg2 as the centroids of A-ring (C1-C2-C3-C4-C13-C12) and B-ring (C6-C7-C8-C9-C15-C14), respectively.



**Table S7.** Stabilization and interaction energies of  $\beta$ -CD–PRT and  $\beta$ -CD–MPL, in comparison to other  $\beta$ -CD–TCA inclusion complexes from DFT full-geometry optimization. <sup>a</sup>

|                                                   | $\beta$ -CD–PRT | $\beta$ -CD–MPL | $\beta$ -CD–NRT <sup>f</sup> | $\beta$ -CD–DPM <sup>g</sup> | $\beta$ -CD–AMT <sup>f</sup> | $\beta$ -CD–IPM <sup>g</sup> | $\beta$ -CD–CPM <sup>h</sup> | $\beta$ -CD– <i>E</i> -DXP <sup>h</sup> | $\beta$ -CD– <i>Z</i> -DXP <sup>h</sup> |
|---------------------------------------------------|-----------------|-----------------|------------------------------|------------------------------|------------------------------|------------------------------|------------------------------|-----------------------------------------|-----------------------------------------|
| $E_{\text{cpx}}$ <sup>b</sup>                     | –5063.43953     | –5102.71021     | –5063.43343                  | –5080.72090                  | –5102.68430                  | –5119.98451                  | –5579.58468                  | –5138.63232                             | –5138.63454                             |
| $E_{\beta\text{-CD\_opt}}$ <sup>c</sup>           | –4272.96510     | –4272.96490     | –4272.96876                  | –4272.96328                  | –4272.96532                  | –4272.96689                  | –4272.98021                  | –4272.96876                             | –4272.97420                             |
| $E_{\text{D\_opt}}$                               | –790.46387      | –829.73394      | –790.45569                   | –807.75084                   | –829.71091                   | –847.00646                   | –1306.59775                  | –865.65107                              | –865.64700                              |
| $E_{\beta\text{-CD\_sp}}$                         | –4272.96318     | –4272.96412     | –4272.96673                  | –4272.96081                  | –4272.96295                  | –4272.96524                  | –4272.97744                  | –4272.96787                             | –4272.97340                             |
| $E_{\text{D\_sp}}$                                | –790.46371      | –829.73380      | –790.45534                   | –807.74992                   | –829.71070                   | –847.00618                   | –1306.59752                  | –865.64185                              | –865.63828                              |
| $\Delta E_{\text{stb}}$ [Hartree] <sup>d</sup>    | –0.01055        | –0.01137        | –0.00898                     | –0.00678                     | –0.00807                     | –0.01115                     | –0.00673                     | –0.01249                                | –0.01334                                |
| $\Delta E_{\text{stb}}$ [kcal mol <sup>–1</sup> ] | –6.62           | –7.13           | –5.64                        | –4.25                        | –5.06                        | –7.00                        | –4.22                        | –7.84                                   | –8.37                                   |
| $\Delta E_{\text{int}}$ [Hartree] <sup>e</sup>    | –0.01264        | –0.01228        | –0.01136                     | –0.01017                     | –0.01065                     | –0.01309                     | –0.00972                     | –0.02261                                | –0.02287                                |
| $\Delta E_{\text{int}}$ [kcal mol <sup>–1</sup> ] | –7.93           | –7.71           | –7.13                        | –6.38                        | –6.68                        | –8.21                        | –6.10                        | –14.19                                  | –14.35                                  |
| Host-guest interactions                           | C–H $\cdots\pi$ | C–H $\cdots\pi$ | C–H $\cdots\pi$              | C–H $\cdots\pi$              | C–H $\cdots\pi$              | C–H $\cdots\pi$              | C–H $\cdots\pi$              | C–H $\cdots\pi$                         | C–H $\cdots\pi$                         |

<sup>a</sup> DFT/B3LYP calculations in the gas phase with mixed basis sets 4–31G for C atoms and 6–31+G\* for H, N, O, F, Cl atoms were carried out using program GAUSSIAN09 [23].

X-ray-derived structures were used as starting models, see also Figure 8 and Table S6.

<sup>b</sup> Original unit of  $E$  is Hartree [1 H = 627.5 kcal mol<sup>–1</sup>].

<sup>c</sup>  $E_{\beta\text{-CD\_opt}}$  in vacuum of the uncomplexed  $\beta$ -CD·12H<sub>2</sub>O [21] is –4272.96662 H.

<sup>d,e</sup> Stabilization energy,  $\Delta E_{\text{stb}} = E_{\text{cpx}} - (E_{\beta\text{-CD\_opt}} + E_{\text{D\_opt}})$

Interaction energy,  $\Delta E_{\text{int}} = E_{\text{cpx}} - (E_{\beta\text{-CD\_sp}} + E_{\text{D\_sp}})$ ,

where  $E_{\text{cpx}}$ ,  $E_{\beta\text{-CD\_opt}}$  and  $E_{\text{D\_opt}}$  are the molecular energies from full optimization of complex, host  $\beta$ -CD and drug TCA in freebase form, respectively;

$E_{\beta\text{-CD\_sp}}$  and  $E_{\text{D\_sp}}$  are the corresponding single-point energies in the complexed states.

<sup>f</sup>  $\beta$ -CD inclusion complexes with NRT and AMT [8].

<sup>g</sup>  $\beta$ -CD inclusion complexes with DPM and IPM [12].

<sup>h</sup>  $\beta$ -CD inclusion complexes with CPM and *E/Z*-DXP [14].

**Table S8.** Dispersion-corrected interaction energies of eight  $\beta$ -CD–TCA inclusion complexes from DFT/B97D calculations. <sup>a</sup>

|                                                   | $\beta$ -CD–PRT | $\beta$ -CD–MPL | $\beta$ -CD–NRT | $\beta$ -CD–DPM | $\beta$ -CD–AMT | $\beta$ -CD–IPM | $\beta$ -CD–CPM | $\beta$ -CD– <i>E</i> -DXP | $\beta$ -CD– <i>Z</i> -DXP | $\beta$ -CD– <i>E</i> -DXP <sup>d</sup> | $\beta$ -CD– <i>E</i> -DXP <sup>e</sup> |
|---------------------------------------------------|-----------------|-----------------|-----------------|-----------------|-----------------|-----------------|-----------------|----------------------------|----------------------------|-----------------------------------------|-----------------------------------------|
| $E_{\text{cpx}}$ <sup>b</sup>                     | −5060.33917     | −5099.58250     | −5060.33092     | −5077.61098     | −5099.55712     | −5116.84912     | −5576.47218     | −5135.48644                | −5135.49822                | −5138.76012                             | −5140.29332                             |
| $E_{\beta\text{-CD\_sp}}$                         | −4270.36980     | −4270.37381     | −4270.37339     | −4270.36722     | −4270.36849     | −4270.37598     | −4270.38452     | −4270.37939                | −4270.38342                | −4272.69870                             | −4274.02846                             |
| $E_{\text{D\_sp}}$                                | −789.90609      | −829.15065      | −789.89585      | −807.18526      | −829.12724      | −846.41818      | −1306.02383     | −865.05040                 | −865.04513                 | −866.00522                              | −866.21921                              |
| $\Delta E_{\text{int}}$ [Hartree] <sup>c</sup>    | −0.06328        | −0.05804        | −0.06168        | −0.05850        | −0.06139        | −0.05495        | −0.06383        | −0.05665                   | −0.06967                   | −0.05620                                | −0.04565                                |
| $\Delta E_{\text{int}}$ [kcal mol <sup>−1</sup> ] | −39.71          | −36.42          | −38.71          | −36.71          | −38.52          | −34.48          | −40.05          | −35.55                     | −43.72                     | −35.26                                  | −28.65                                  |

<sup>a</sup> DFT/B97D calculations in the gas phase with mixed basis sets 4–31G for C atoms and 6–31+G\* for H, N, O, F, Cl atoms were carried out using program GAUSSIAN09 [23].  
DFT/B3LYP-optimized structures were used for single-point energy calculations, see also Table S7.

<sup>b</sup> Original unit of  $E$  is Hartree [1 H = 627.5 kcal mol<sup>−1</sup>].

<sup>c</sup> Interaction energy,  $\Delta E_{\text{int}} = E_{\text{cpx}} - (E_{\beta\text{-CD\_sp}} + E_{\text{D\_sp}})$ ,  
where  $E_{\text{cpx}}$ ,  $E_{\beta\text{-CD\_sp}}$  and  $E_{\text{D\_sp}}$  are the single-point energies of complex,  
host  $\beta$ -CD and drug TCA in freebase form, respectively.

<sup>d,e</sup> Different basis sets 6-31G(d,p) and 6-311++G(2d,p) were used for single-point energy calculations of the  $\beta$ -CD–*E*-DXP complex.

**Table S9.** BSSE- and dispersion-corrected interaction energies of eight  $\beta$ -CD–TCA inclusion complexes from DFT/B97D calculations. <sup>a</sup>

|                                                         | $\beta$ -CD–PRT | $\beta$ -CD–MPL | $\beta$ -CD–NRT | $\beta$ -CD–DPM | $\beta$ -CD–AMT | $\beta$ -CD–IPM | $\beta$ -CD–CPM | $\beta$ -CD– <i>E</i> -DXP | $\beta$ -CD– <i>Z</i> -DXP |
|---------------------------------------------------------|-----------------|-----------------|-----------------|-----------------|-----------------|-----------------|-----------------|----------------------------|----------------------------|
| $E_{\text{cpx\_BSSE}}$ <sup>b</sup>                     | −5060.32159     | −5099.56676     | −5060.31412     | −5077.59455     | −5099.53961     | −5116.83408     | −5576.45497     | −5135.47075                | −5135.47897                |
| $E_{\beta\text{-CD(cpx)\_sp}}$                          | −4270.37323     | −4270.37701     | −4270.37705     | −4270.37091     | −4270.37180     | −4270.37919     | −4270.38848     | −4270.38283                | −4270.38765                |
| $E_{\text{D(cpx)\_sp}}$                                 | −789.92015      | −829.16331      | −789.90927      | −807.19824      | −829.14144      | −846.43028      | −1306.03692     | −865.06269                 | −865.06016                 |
| $\Delta E_{\text{BSSE}}$ [Hartree] <sup>c</sup>         | 0.01758         | 0.01574         | 0.01681         | 0.01643         | 0.01751         | 0.01504         | 0.01721         | 0.01569                    | 0.01926                    |
| $\Delta E_{\text{BSSE}}$ [kcal mol <sup>−1</sup> ]      | 11.03           | 9.88            | 10.55           | 10.31           | 10.99           | 9.44            | 10.80           | 9.85                       | 12.08                      |
| $\Delta E_{\text{int\_BSSE}}$ [Hartree] <sup>d</sup>    | −0.04579        | −0.04218        | −0.04460        | −0.04184        | −0.04388        | −0.03965        | −0.04678        | −0.04092                   | −0.05041                   |
| $\Delta E_{\text{int\_BSSE}}$ [kcal mol <sup>−1</sup> ] | −28.73          | −26.47          | −27.99          | −26.25          | −27.54          | −24.88          | −29.35          | −25.68                     | −31.63                     |

<sup>a</sup> DFT/B97D calculations in the gas phase with mixed basis sets 4–31G for C atoms and 6–31+G\* for H, N, O, F, Cl atoms were carried out using program GAUSSIAN09 [23].  
DFT/B3LYP-optimized structures were used for single-point energy calculations, see also Tables S7 and S8.

<sup>b</sup> Original unit of  $E$  is Hartree [1 H = 627.5 kcal mol<sup>−1</sup>].

<sup>c</sup> The basis set superposition error (BSSE) energy by counterpoise correction [24],  $\Delta E_{\text{BSSE}} = E_{\text{cpx\_BSSE}} - E_{\text{cpx}} = [E_{\beta\text{-CD\_sp}} - E_{\beta\text{-CD(cpx)\_sp}}] + [E_{\text{D\_sp}} - E_{\text{D(cpx)\_sp}}]$   
where  $E_{\text{cpx\_BSSE}}$  and  $E_{\text{cpx}}$  are corrected and uncorrected complex energies, respectively.

<sup>d</sup> BSSE-corrected interaction energy,  $\Delta E_{\text{int\_BSSE}} = E_{\text{cpx}} - (E_{\beta\text{-CD(cpx)\_sp}} + E_{\text{D(cpx)\_sp}}) = \Delta E_{\text{int}} + \Delta E_{\text{BSSE}}$   
where  $E_{\beta\text{-CD(cpx)\_sp}}$  and  $E_{\text{D(cpx)\_sp}}$  are energies of two components in the complex.

## References

- Georgiou, M.E.; Koupparis, M.A.; Georgiou, C.A. Rapid automated spectrophotometric competitive complexation studies of drugs with cyclodextrins using the flow injection gradient technique: tricyclic antidepressant drugs with  $\alpha$ -cyclodextrin. *Analyst* **1999**, *124*, 391–396. <https://doi.org/10.1039/A808426B>.
- Valsami, G.N.; Koupparis, M.A.; Macheras, P.E. Complexation studies of cyclodextrins with tricyclic antidepressants using ion-selective electrodes. *Pharm. Res.* **1992**, *9*, 94–100. <https://doi.org/10.1023/A:1018940013006>.
- Junquera, E.; Romero, J.C.; Aicart, E. Behavior of tricyclic antidepressants in aqueous solution: self-aggregation and association with  $\beta$ -cyclodextrin. *Langmuir* **2001**, *17*, 1826–1832. <https://doi.org/10.1021/la000819q>.
- Cano, J.; Rodriguez, A.; Aicart, E.; Junquera, E. Temperature effect on the complex formation between tricyclic antidepressant drugs (amitriptyline or imipramine) and hydroxypropyl- $\beta$ -cyclodextrin in water. *J. Incl. Phenom. Macrocycl. Chem.* **2007**, *59*, 279–285. <https://doi.org/10.1007/s10847-007-9328-x>.
- Piperaki, S.; Parissi-Poulou, M.; Koupparis, M. A separation study of tricyclic antidepressant drugs by HPLC with  $\beta$ -cyclodextrin bonded stationary phase. *J. Liq. Chromatogr. Relat. Technol.* **1993**, *16*, 3487–3508. <https://doi.org/10.1080/10826079308019703>.
- Di Pietro, M.E.; Ferro, M.; Mele, A. Inclusion complexes of tricyclic drugs and  $\beta$ -cyclodextrin: Inherent chirality and dynamic behaviour. *Int. J. Pharm.* **2020**, *588*, 119775. <https://doi.org/10.1016/j.ijpharm.2020.119775>.
- Castiglione, F.; Ganazzoli, F.; Malpezzi, L.; Mele, A.; Panzeri, W.; Raffaini, G. Inclusion complexes of  $\beta$ -cyclodextrin with tricyclic drugs: an X-ray diffraction, NMR and molecular dynamics study. *Beilstein J. Org. Chem.* **2017**, *13*, 714–719. <https://doi.org/10.3762/bjoc.13.70>.
- Aree, T.  $\beta$ -Cyclodextrin encapsulation of nortriptyline HCl and amitriptyline HCl: molecular insights from single-crystal X-ray diffraction and DFT calculation. *Int. J. Pharm.* **2020**, *575*, 118899. <https://doi.org/10.1016/j.ijpharm.2019.118899>.
- Viswalingam, M.; Prabu, S.; Sivakumar, K.; Rajamohan, R. Preparation and characterization of a imipramine- $\beta$ -cyclodextrin inclusion complex. *Instrum. Sci. Technol.* **2016**, *44*, 651–671. <https://doi.org/10.1080/10739149.2016.1177726>.
- Sousa, F.B.D.; Denadai, A.M.L.; Lula, I.S.; Nascimento Jr, C.S.; Neto, N.S.F.; Lima, A.C.; ... Sinisterra, R.D. Supramolecular self-assembly of cyclodextrin and higher water soluble guest: Thermodynamics and topological studies. *J. Am. Chem. Soc.* **2008**, *130*, 8426–8436. <https://doi.org/10.1021/ja801080v>.
- Jenita, M.J.; Prabhu, A.; Rajendiran, N. Theoretical study of inclusion complexation of tricyclic antidepressant drugs with  $\beta$ -cyclodextrin. *Ind. J. Chem.* **2012**, *51A*, 1686–1694. <http://nopr.niscair.res.in/handle/123456789/15201>.
- Aree, T.  $\beta$ -Cyclodextrin inclusion complexation with tricyclic antidepressants desipramine and imipramine: a structural chemistry perspective. *J. Pharm. Sci.* **2020**, *109*, 3086–3094. <https://doi.org/10.1016/j.xphs.2020.07.007>.
- Misiuk, W.; Zalewska, M. Study on the inclusion interactions of  $\beta$ -cyclodextrin and its derivative with clomipramine by spectroscopy and its analytic application. *Anal. Lett.* **2008**, *41*, 543–560. <https://doi.org/10.1080/00032710801910650>.
- Aree, T. Supramolecular Complexes of  $\beta$ -Cyclodextrin with Clomipramine and Doxepin: Effect of the Ring Substituent and Component of Drugs on Their Inclusion Topologies and Structural Flexibilities. *Pharmaceuticals* **2020**, *13*, 278. <https://doi.org/10.3390/ph13100278>.

15. Rajendiran, N.; Sankaranarayanan, R.K.; Saravanan, J. A study of supramolecular host–guest interaction of dothiepin and doxepin drugs with cyclodextrin macrocycles. *J. Mol. Struct.* **2014**, *1067*, 252–260. <https://doi.org/10.1016/j.molstruc.2014.03.051>.
16. Jones, C.J.; Larive, C.K. Microcoil NMR study of the interactions between doxepin,  $\beta$ -cyclodextrin, and acetate during capillary isotachopheresis. *Anal. Chem.* **2012**, *84*, 7099–7106. <https://doi.org/10.1021/ac301401p>.
17. Sankaranarayanan, R.K.; Siva, S.; Venkatesh, G.; Prabhu, A.A.M.; Rajendiran, N. Dual fluorescence of dothiepin, doxepin drugs—effect of solvents and  $\beta$ -cyclodextrin. *J. Mol. Liq.* **2011**, *161*, 107–114. <https://doi.org/10.1016/j.molliq.2011.04.016>.
18. Cruz, J.R.; Becker, B.A.; Morris, K.F.; Larive, C.K. NMR characterization of the host–guest inclusion complex between  $\beta$ -cyclodextrin and doxepin. *Magn. Reson. Chem.* **2008**, *46*, 838–845. <https://doi.org/10.1002/mrc.2267>.
19. Cremer, D.T.; Pople, J.A. General definition of ring puckering coordinates. *J. Am. Chem. Soc.* **1975**, *97*, 1354–1358. <https://doi.org/10.1021/ja00839a011>.
20. Aree, T.; Jongrungruangchok, S. Crystallographic evidence for  $\beta$ -cyclodextrin inclusion complexation facilitating the improvement of antioxidant activity of tea (+)-catechin and (–)-epicatechin. *Carbohydr. Polym.* **2016**, *140*, 362–373. <https://doi.org/10.1016/j.carbpol.2015.12.066>.
21. Lindner, K.; Saenger, W. Crystal and molecular structure of cyclohepta-amylose dodecahydrate. *Carbohydr. Res.* **1982**, *99*, 103–115. [https://doi.org/10.1016/S0008-6215\(00\)81901-1](https://doi.org/10.1016/S0008-6215(00)81901-1).
22. French, A.D.; Johnson, G.P. Linkage and pyranosyl ring twisting in cyclodextrins. *Carbohydr. Res.* **2007**, *342*, 1223–1237. <https://doi.org/10.1016/j.carres.2007.02.033>.
23. Frisch, M.J.; Trucks, G.W.; Schlegel, H.B.; Scuseria, G.E.; Robb, M.A.; Cheeseman, J.R.; ... Nakatsuji, H. GAUSSIAN09, Revision A.01. Wallingford, CT: Gaussian Inc., 2009.
24. Boys, S.F.; Bernardi, F.J.M.P. The calculation of small molecular interactions by the differences of separate total energies. Some procedures with reduced errors. *Mol. Phys.* **1970**, *19*, 553–566. <https://doi.org/10.1080/00268977000101561>.
